# Supplementary material
Source: PubMed Central journal article supplement (PMC3116429)
Supplement: 1102811108_pnas.201102811SI.pdf [file 1102811108_pnas.201102811SI.pdf]

# Supporting Information

Lutes et al. 10.1073/pnas.1102811108

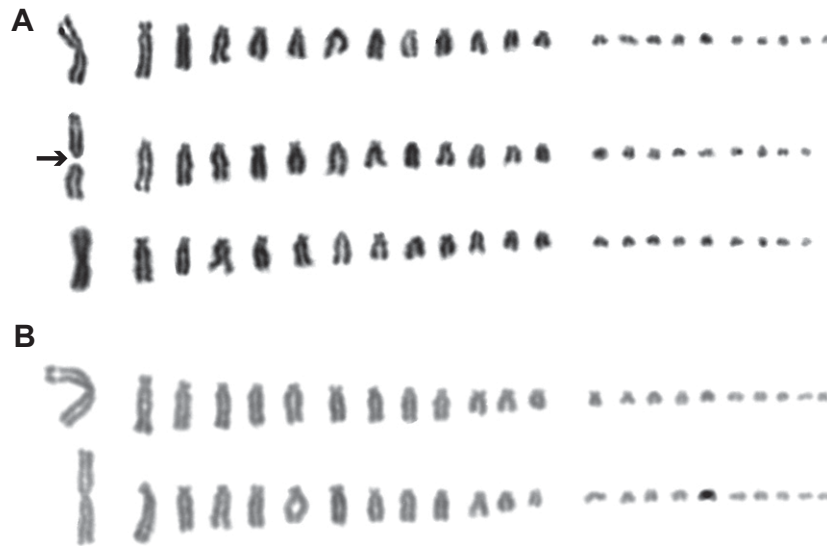

**Fig. S1.** Karyotypes of *A. inornata* and *A. exsanguis*. The karyotype of the *A. exsanguis* (A) and *A. inornata* (B) were determined from metaphase chromosomes of cultured cells. Each row shows a haploid chromosome set, with chromosomes arranged by decreasing size. *A. exsanguis* collected at Alamogordo, NM, in 2003–2005 show centric fission of one of the three large metacentric chromosomes in the triploid karyotype (indicated with an arrow). This chromosomal change from the ancestral karyotype has been reported for *A. exsanguis* from Hidalgo county (1).

1. Cole CJ (1979) Chromosome inheritance in parthenogenetic lizards and evolution of allopolyploidy in reptiles. *Journal of Heredity* 70(2):95–102.

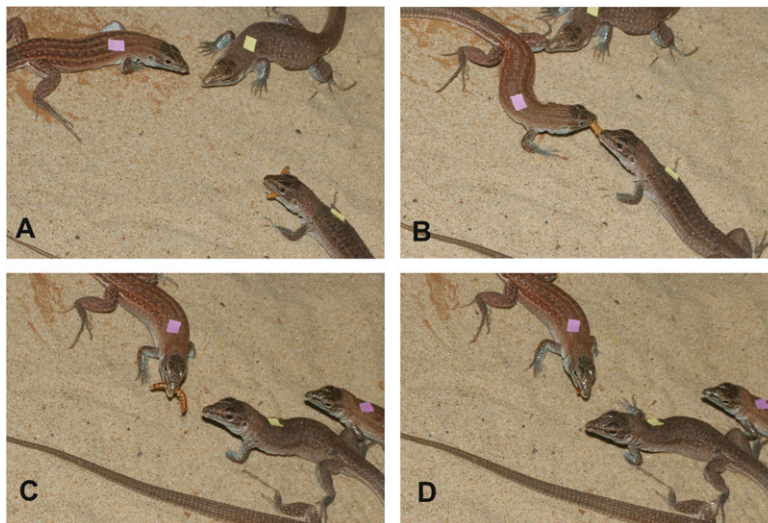

**Fig. S2.** Competition over food item between *A. exsanguis* and tetraploid hybrid. *A. exsanguis* (marked with yellow tape, A) on bottom right has captured *T. molitor* (B) Tetraploid hybrid (marked with pink tape) bites end of food item and (C) pulls it out of the mouth of the *A. exsanguis*. (D) Tetraploid hybrid consumes the food item.

**Table S1. Primers used for microsatellite amplification**

| Microsatellite | Oligo sequence (5' → 3')                         |
|----------------|--------------------------------------------------|
| MS1            | TGCATGATGGAGGAATCTTC<br>CTAGTGGTGATAGAAACATGG    |
| MS7            | AACTAAGTGCTAAGTGTGAC<br>ACAGTCTTAGAGATCACAAG     |
| MS8            | ACACCCAAAGTCCTCAACAG<br>CTAGTACATGTGTAAGGGTG     |
| MS10           | GACCAATAATGTGGAAGCTG<br>ACATGGCTGAGTAATTGGTG     |
| MS11           | GTGCATTCAATGATGTATT<br>TTTGCTCAGTGAAGTAACTAG     |
| MS12           | TACCCACCTGGAGATGTTTAG<br>AGGACGCCTAAAATAGGAAG    |
| MS13           | CCAGCAGTCTGTTCTCATAGG<br>TTTATTGTTTGCAGCCTTGAG   |
| MS14           | TGGAGGCAGTCTTGGTATC<br>GAACATTGACCGCATCAC        |
| MS15           | TTAAAGCAGAGGTCAGGTTATC<br>GATGGAAGAATAGGATGATGAA |

**Table S2. Size ranges for each allele as determined by GeneMapper software**

| Microsatellite/allele | Size range    |
|-----------------------|---------------|
| <b>MS1</b>            |               |
| 277                   | 276.25–276.87 |
| 312                   | 312.09–312.64 |
| 322                   | 321.87–322.45 |
| 323                   | 322.73–323.45 |
| 348                   | 348.04–348.38 |
| <b>MS7</b>            |               |
| 247                   | 246.68–247.06 |
| 270                   | 269.71–270.05 |
| 274                   | 273.55–273.80 |
| 282                   | 281.43–281.87 |
| 289                   | 289.08–289.57 |
| <b>MS8</b>            |               |
| 207                   | 206.98–207.17 |
| 209                   | 208.66–208.74 |
| 213                   | 212.74–212.93 |
| 219                   | 218.92–219.13 |
| 230                   | 230.39–230.56 |
| <b>MS10</b>           |               |
| 300                   | 299.83–299.92 |
| 304                   | 304.06–304.26 |
| 330                   | 329.82–330.05 |
| 334                   | 334.10–334.39 |
| <b>MS11</b>           |               |
| 209                   | 208.94–209.07 |
| 226                   | 226.23–226.27 |
| 255                   | 255.09–255.69 |
| 260                   | 260.24–260.72 |
| 330                   | 330.09–330.20 |
| <b>MS12</b>           |               |
| 113                   | 113.09–113.26 |
| 171                   | 170.74–170.95 |
| 210                   | 210.23–210.39 |
| 231                   | 231.16–231.29 |
| 251                   | 250.52–250.79 |
| <b>MS13</b>           |               |
| 229                   | 228.04–229.06 |
| 255                   | 254.95–255.36 |
| 328                   | 327.52–327.93 |
| 350                   | 349.82–350.16 |
| 369                   | 369.25        |
| <b>MS14</b>           |               |
| 292                   | 291.74–291.95 |
| 299                   | 298.92–299.14 |
| 302                   | 301.64        |
| 310                   | 309.88–310.18 |
| 336                   | 335.77        |
| <b>MS15</b>           |               |
| 223                   | 223.14–223.38 |
| 264                   | 263.73–263.97 |
| 305                   | 305.32        |
| 329                   | 329.43–329.74 |
